# Supplementary material for: A novel signature derived from immunoregulatory and hypoxia genes predicts prognosis in liver and five other cancers
Source: PubMed Central journal article supplement (PMC6327401; doi:10.1186/s12967-019-1775-9), 2019-01-09
Supplement: 12967_2019_1775_MOESM7_ESM.pdf [file 12967_2019_1775_MOESM7_ESM.pdf]

# Additional file 7

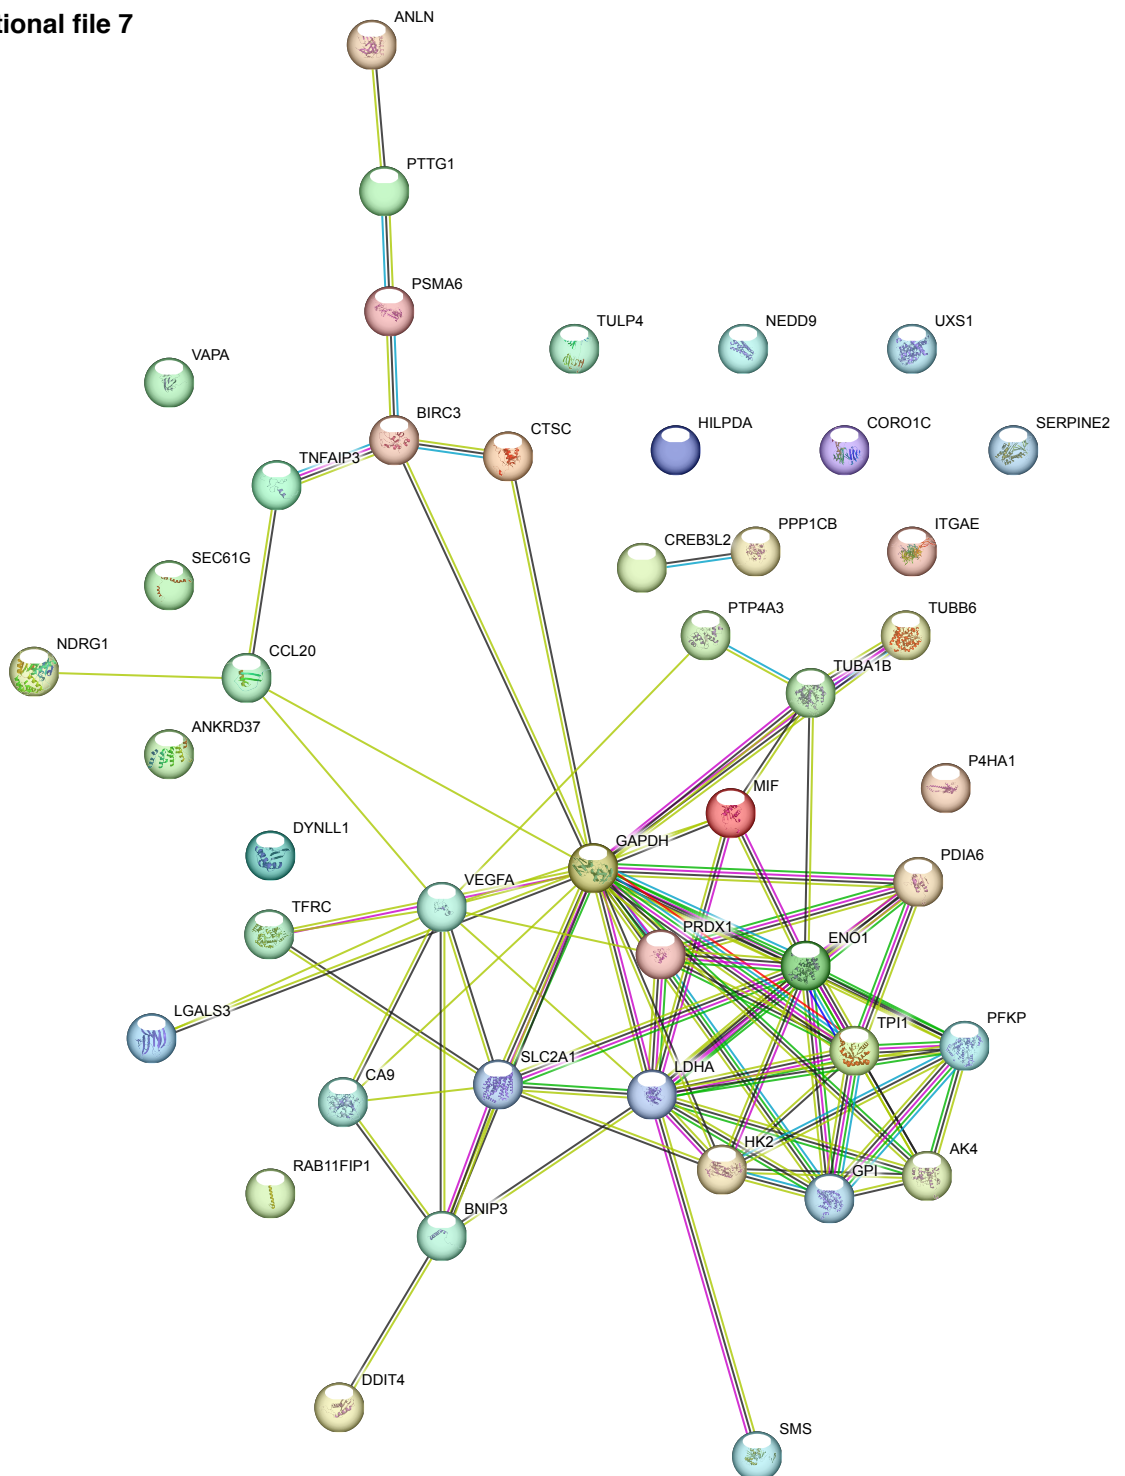

Protein-protein interaction enrichment, P-value < 1.0e-16
