# Supplementary material for: A novel signature derived from immunoregulatory and hypoxia genes predicts prognosis in liver and five other cancers
Source: PubMed Central journal article supplement (PMC6327401; doi:10.1186/s12967-019-1775-9), 2019-01-09
Supplement: 12967_2019_1775_MOESM14_ESM.pdf [file 12967_2019_1775_MOESM14_ESM.pdf]

**Additional file 14. Univariate and multivariate Cox proportional hazards analysis of risk factors associated with overall survival in multiple cancers.**

|                                      | Univariate            |                 | Multivariate           |                 |
|--------------------------------------|-----------------------|-----------------|------------------------|-----------------|
|                                      | Hazard Ratio (95% CI) | P-value         | Hazard Ratio (95% CI)  | P-value         |
| <b>Head and neck</b>                 |                       |                 |                        |                 |
| 8-gene signature (high vs. low risk) | 1.64 (1.166 - 2.308)  | <b>4.70E-03</b> | 1.658 (1.178 - 2.322)  | <b>3.74E-03</b> |
| TNM staging (II & III vs. I)         | 1.466 (1.188 - 1.808) | <b>3.53E-04</b> | 1.475 (1.194 - 1.820)  | <b>3.05E-04</b> |
| <i>TP63</i> mutation (Yes vs. No)    | 1.046 (0.658 - 1.663) | 0.85            |                        |                 |
| <i>CDKN2A</i> mutation (Yes vs. No)  | 1.318 (0.892 - 1.947) | 0.17            |                        |                 |
| <i>PIK3CA</i> mutation (Yes vs. No)  | 1.261 (0.785 - 2.026) | 0.34            |                        |                 |
| <b>Renal papillary cell</b>          |                       |                 |                        |                 |
| 8-gene signature (high vs. low risk) | 2.311 (1.097 - 5.484) | <b>0.0475</b>   | 1.190 (0.4771 - 2.970) | 0.709           |
| TNM staging (II & III vs. I)         | 2.71 (1.893 - 3.878)  | <b>5.30E-08</b> | 2.647 (1.815 - 3.861)  | <b>4.35E-07</b> |
| <b>Lung</b>                          |                       |                 |                        |                 |
| 8-gene signature (high vs. low risk) | 1.453 (1.036 - 2.038) | <b>0.0304</b>   | 1.458 (1.041 - 2.043)  | <b>0.0281</b>   |
| TNM staging (II & III vs. I)         | 1.597 (1.364 - 1.87)  | <b>6.11E-09</b> | 1.598 (1.362 - 1.873)  | <b>8.04E-09</b> |
| <i>TP53</i> mutation (Yes vs. No)    | 1.316 (0.863 - 2.006) | 0.203           |                        |                 |
| <i>KRAS</i> mutation (Yes vs. No)    | 0.764 (0.401 - 1.455) | 0.412           |                        |                 |
| <i>CDKN2A</i> mutation (Yes vs. No)  | 1.759 (1.057 - 2.927) | <b>0.030</b>    | 1.533 (0.920 - 2.554)  | 0.101           |
| <b>Pancreas</b>                      |                       |                 |                        |                 |
| 8-gene signature (high vs. low risk) | 1.961 (1.212 - 3.174) | <b>0.00609</b>  | 1.906 (1.177 - 3.089)  | <b>0.00878</b>  |
| TNM staging (II & III vs. I)         | 1.339 (0.897 - 1.998) | 0.153           | 1.282 (0.835 - 1.967)  | 0.255           |
| <b>Endometrium</b>                   |                       |                 |                        |                 |
| 8-gene signature (high vs. low risk) | 2.33 (1.341 - 4.05)   | <b>0.0027</b>   | 1.986 (1.136 - 3.472)  | <b>0.016</b>    |
| TNM staging (II & III vs. I)         | 1.802 (1.431 - 2.269) | <b>5.60E-07</b> | 1.722 (1.365 - 2.172)  | <b>4.56E-06</b> |
