# Supplementary material for: A novel signature derived from immunoregulatory and hypoxia genes predicts prognosis in liver and five other cancers
Source: Springer Nature journal article supplement (doi:10.1186/s12967-019-1775-9), 2019-01-09
Supplement: MOESM1 [file 16388076]

**Additional file 1. Abbreviations and number of tumour and non-tumour samples in TCGA cancers.**

| <b>Cohort (TCGA abbreviations)</b> | <b>Non-tumour #</b> | <b>Tumour #</b> | <b>Description</b>                                               |
|------------------------------------|---------------------|-----------------|------------------------------------------------------------------|
| BLCA                               | 19                  | 408             | Bladder Urothelial Carcinoma                                     |
| BRCA                               | 112                 | 10939           | Breast invasive carcinoma                                        |
| CESC                               | 3                   | 304             | Cervical squamous cell carcinoma and endocervical adenocarcinoma |
| CHOL                               | 9                   | 36              | Cholangiocarcinoma                                               |
| COAD                               | 41                  | 285             | Colon adenocarcinoma                                             |
| ESCA                               | 11                  | 184             | Esophageal carcinoma                                             |
| GBM                                | 5                   | 153             | Glioblastoma multiforme                                          |
| GBMLGG                             | 5                   | 669             | Glioma                                                           |
| HNSC                               | 44                  | 520             | Head and Neck squamous cell carcinoma                            |
| KICH                               | 25                  | 66              | Kidney Chromophobe                                               |
| KIPAN                              | 129                 | 889             | Pan-kidney cohort                                                |
| KIRC                               | 72                  | 533             | Kidney renal clear cell carcinoma                                |
| KIRP                               | 32                  | 290             | Kidney renal papillary cell carcinoma                            |
| LIHC                               | 50                  | 371             | Liver hepatocellular carcinoma                                   |
| LUAD                               | 59                  | 515             | Lung adenocarcinoma                                              |
| LUSC                               | 51                  | 501             | Lung squamous cell carcinoma                                     |
| PAAD                               | 4                   | 178             | Pancreatic adenocarcinoma                                        |
| PCPG                               | 3                   | 179             | Pheochromocytoma and Paraganglioma                               |
| PRAD                               | 52                  | 497             | Prostate adenocarcinoma                                          |
| SARC                               | 2                   | 259             | Sarcoma                                                          |
| STAD                               | 35                  | 415             | Stomach adenocarcinoma                                           |
| STES                               | 46                  | 599             | Stomach and Esophageal carcinoma                                 |
| THCA                               | 59                  | 501             | Thyroid carcinoma                                                |
| THYM                               | 2                   | 120             | Thymoma                                                          |
| UCEC                               | 11                  | 370             | Uterine Corpus Endometrial Carcinoma                             |
