# Supplementary material for: A novel signature derived from immunoregulatory and hypoxia genes predicts prognosis in liver and five other cancers
Source: Springer Nature journal article supplement (doi:10.1186/s12967-019-1775-9), 2019-01-09
Supplement: MOESM2 [file 16388076]

**Additional file 2. Clinical characteristics of HCC patients (n = 839)**

| <b>Characteristic</b> | <b>GSE14520</b>               | <b>TCGA-LIHC</b> | <b>LIRI-JP</b> |
|-----------------------|-------------------------------|------------------|----------------|
| Patient number        | Total                         | 242              | 226            |
|                       | Male                          | 211 (87%)        | 166 (73%)      |
|                       | Female                        | 31 (13%)         | 60 (27%)       |
| Age (years)           | Range                         | 21 - 77          | 31 - 89        |
|                       | Median                        | 50               | 68             |
| Viral etiology        | Hepatitis B                   | 242 (100%)       | 59 (26%)       |
|                       | Hepatitis C                   |                  | 120 (53%)      |
|                       | Hepatitis B & C               |                  | 4 (2%)         |
|                       | Negative                      |                  | 43 (19%)       |
|                       | Not available                 |                  | 90 (23%)       |
| Edmondson grade       | I                             |                  | 28 (12%)       |
|                       | II                            |                  | 156 (69%)      |
|                       | III                           |                  | 21 (9%)        |
|                       | IV                            |                  | 1 (0.4%)       |
|                       | Not available                 | 242 (100%)       | 371 (100%)     |
| Tumour size           | Small (< 5cm)                 | 153 (63%)        | 174 (77%)      |
|                       | Large (> 5cm)                 | 89 (37%)         | 52 (23%)       |
|                       | Not available                 |                  | 371 (100%)     |
| Fibrosis              | Negative                      | 19 (8%)          | 21 (9%)        |
|                       | Portal fibrosis (stages 1 -2) |                  | 73 (32%)       |
|                       | Fibrous septa (stages 3 - 4)  |                  | 132 (58%)      |
|                       | Nodular formation (stage 5)   |                  | 9 (2%)         |
|                       | Cirrhosis (stage 6)           | 223 (92%)        | 72 (19%)       |
|                       | Not available                 |                  | 153 (41%)      |
| Alcohol consumption   | Yes                           |                  | 86 (38%)       |
|                       | No                            |                  | 128 (57%)      |
|                       | Not available                 | 242 (100%)       | 253 (68%)      |
| Smoker                | Yes                           |                  | 122 (54%)      |
|                       | No                            |                  | 94 (42%)       |
|                       | Not available                 | 242 (100%)       | 358 (96%)      |
| AFP                   | Low (< 300ng/mL)              | 128 (53%)        | 218 (59%)      |
|                       | High (> 300ng/mL)             | 110 (45%)        | 66 (18%)       |
|                       | Not available                 | 4 (2%)           | 87 (23%)       |
| BCLC stage            | 0                             | 20 (8%)          | 226 (100%)     |
|                       | A                             | 152 (63%)        |                |
|                       | B                             | 24 (10%)         |                |
|                       | C                             | 29 (12%)         |                |
|                       | Not available                 | 17 (7%)          | 371 (100%)     |
| TNM stage             | I                             | 96 (40%)         | 35 (15%)       |
|                       | II                            | 78 (32%)         | 101 (45%)      |
|                       | III                           | 51 (21%)         | 68 (30%)       |
|                       | IV                            |                  | 18 (8%)        |
|                       | Not available                 | 17 (7%)          | 89 (24%)       |
