# Supplementary material for: A novel signature derived from immunoregulatory and hypoxia genes predicts prognosis in liver and five other cancers
Source: Springer Nature journal article supplement (doi:10.1186/s12967-019-1775-9), 2019-01-09
Supplement: MOESM8 [file 16388076]

**Additional file 8. The minimal prognostic 8-gene classifier.**

| Gene Symbol | Description                                     |
|-------------|-------------------------------------------------|
| CA9         | carbonic anhydrase 9                            |
| CCL20       | C-C motif chemokine ligand 20                   |
| CORO1C      | coronin 1C                                      |
| CTSC        | cathepsin C                                     |
| LDHA        | lactate dehydrogenase A                         |
| NDRG1       | N-myc downstream regulated 1                    |
| PTP4A3      | protein tyrosine phosphatase type IVA, member 3 |
| TUBA1B      | tubulin alpha 1b                                |
