# Supplementary material for: A novel signature derived from immunoregulatory and hypoxia genes predicts prognosis in liver and five other cancers
Source: Springer Nature journal article supplement (doi:10.1186/s12967-019-1775-9), 2019-01-09

## Additional file 11

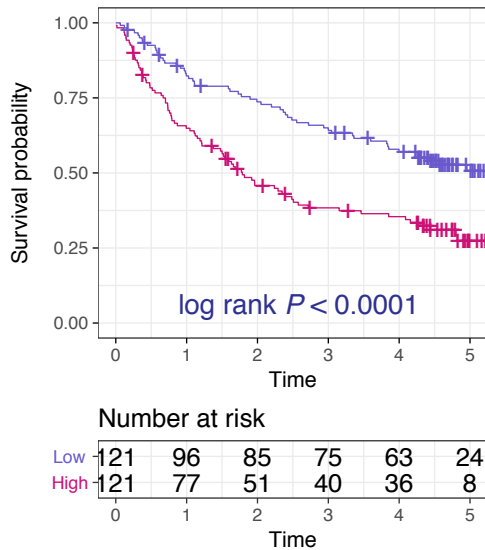

Supplement: MOESM11 [file 16388076]
