# Supplementary material for: A novel signature derived from immunoregulatory and hypoxia genes predicts prognosis in liver and five other cancers
Source: Springer Nature journal article supplement (doi:10.1186/s12967-019-1775-9), 2019-01-09
Supplement: MOESM16 [file 16388076]

## Additional file 16

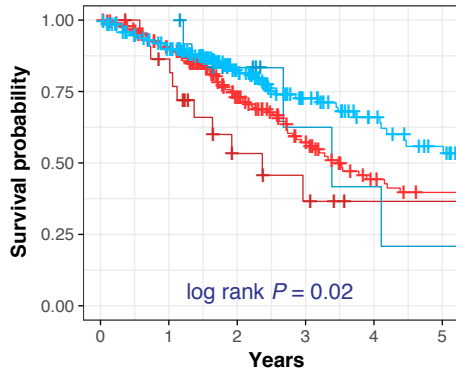

Number at risk

|                                 |     |     |    |    |    |    |
|---------------------------------|-----|-----|----|----|----|----|
| High Risk, <i>CDKN2A</i> mutant | 23  | 18  | 7  | 4  | 1  | 1  |
| High Risk, <i>CDKN2A</i> WT     | 185 | 152 | 84 | 52 | 30 | 24 |
| Low Risk, <i>CDKN2A</i> mutant  | 13  | 13  | 7  | 3  | 2  | 1  |
| Low Risk, <i>CDKN2A</i> WT      | 194 | 158 | 89 | 52 | 34 | 23 |
