# Supplementary material for: A novel signature derived from immunoregulatory and hypoxia genes predicts prognosis in liver and five other cancers
Source: J Transl Med. 2019 Jan 9;17:14. doi: 10.1186/s12967-019-1775-9 (PMC6327401; doi:10.1186/s12967-019-1775-9)
Supplement: Supplementary file 4 — Additional file 4. The 45-gene signature associated with tumor hypoxia and T-cell infiltration. [file 12967_2019_1775_MOESM4_ESM.pdf]

**Additional file 4. The 45-gene classifier associated with tumour hypoxia and T-cell infiltration.**

| Gene Symbol | Description                                                       |
|-------------|-------------------------------------------------------------------|
| AK4         | adenylate kinase 4                                                |
| ANKRD37     | ankyrin repeat domain 37                                          |
| ANLN        | anillin actin binding protein                                     |
| BIRC3       | baculoviral IAP repeat containing 3                               |
| BNIP3       | BCL2 interacting protein 3                                        |
| CA9         | carbonic anhydrase 9                                              |
| CCL20       | C-C motif chemokine ligand 20                                     |
| CORO1C      | coronin 1C                                                        |
| CREB3L2     | cAMP responsive element binding protein 3 like 2                  |
| CTSC        | cathepsin C                                                       |
| DDIT4       | DNA damage inducible transcript 4                                 |
| DYNLL1      | dynein light chain LC8-type 1                                     |
| ENO1        | enolase 1                                                         |
| GAPDH       | glyceraldehyde-3-phosphate dehydrogenase                          |
| GPI         | glucose-6-phosphate isomerase                                     |
| HILPDA      | hypoxia inducible lipid droplet associated                        |
| HK2         | hexokinase 2                                                      |
| ITGAE       | integrin subunit alpha E                                          |
| LDHA        | lactate dehydrogenase A                                           |
| LGALS3      | galectin 3                                                        |
| MIF         | macrophage migration inhibitory factor                            |
| NDRG1       | N-myc downstream regulated 1                                      |
| NEDD9       | neural precursor cell expressed, developmentally down-regulated 9 |
| P4HA1       | prolyl 4-hydroxylase subunit alpha 1                              |
| PDIA6       | protein disulfide isomerase family A member 6                     |
| PFKP        | phosphofructokinase, platelet                                     |
| PPP1CB      | protein phosphatase 1 catalytic subunit beta                      |
| PRDX1       | peroxiredoxin 1                                                   |
| PSMA6       | proteasome subunit alpha 6                                        |
| PTP4A3      | protein tyrosine phosphatase type IVA, member 3                   |
| PTTG1       | pituitary tumor-transforming 1                                    |
| RAB11FIP1   | RAB11 family interacting protein 1                                |
| SEC61G      | Sec61 translocon gamma subunit                                    |
| SERPINE2    | serpin family E member 2                                          |
| SLC2A1      | solute carrier family 2 member 1                                  |
| SMS         | spermine synthase                                                 |
| TFRC        | transferrin receptor                                              |
| TNFAIP3     | TNF alpha induced protein 3                                       |
| TPI1        | triosephosphate isomerase 1                                       |
| TUBA1B      | tubulin alpha 1b                                                  |
| TUBB6       | tubulin beta 6 class V                                            |
| TULP4       | tubby like protein 4                                              |
| UXS1        | UDP-glucuronate decarboxylase 1                                   |
| VAPA        | VAMP associated protein A                                         |
| VEGFA       | vascular endothelial growth factor A                              |
